# Supplementary material for: Technical note: Determination of binary gas phase diffusion coefficients of unstable and adsorbing atmospheric trace gases at low temperature – Arrested Flow and Twin Tube method
Source: Copernicus journal article supplement (doi:10.5194/acp-2019-1050), 2019-12-09
Supplement: Supplementary file 1 [file acp-2019-1050-supplement.zip]

### S1 Simultaneous diffusion of NO<sub>2</sub>/N<sub>2</sub>O<sub>4</sub> in the TT experiment

After a short time, a time independent concentration profile is established in the diffusion capillaries of the TT experiment. The flows of the diffusing species are given by

$$J(\text{NO}_2) = D(\text{NO}_2) \left( \frac{\partial c(\text{NO}_2)}{\partial z} \right)_t, \quad (\text{S1})$$

$$J(\text{N}_2\text{O}_4) = D(\text{N}_2\text{O}_4) \left( \frac{\partial c(\text{N}_2\text{O}_4)}{\partial z} \right)_t. \quad (\text{S2})$$

It is assumed that the equilibrium between NO<sub>2</sub> and N<sub>2</sub>O<sub>4</sub> is established everywhere in the capillary. The equilibrium is described by Eq. (21). The total flux of the pseudo species N<sub>IV</sub> = NO<sub>2</sub> + 2 N<sub>2</sub>O<sub>4</sub> though the capillaries is given by

$$\begin{aligned} J(\text{N}_{\text{IV}}) &= J(\text{NO}_2) + 2J(\text{N}_2\text{O}_4), \\ &= D(\text{NO}_2) \left( \frac{\partial c(\text{NO}_2)}{\partial z} \right)_t \\ &\quad + 2D(\text{N}_2\text{O}_4) \left( \frac{\partial c(\text{N}_2\text{O}_4)}{\partial z} \right)_t \end{aligned}$$

The concentration gradients of NO<sub>2</sub> and N<sub>2</sub>O<sub>4</sub> are not independent. They are joined by Eq. (21):

$$\left( \frac{\partial c(\text{N}_2\text{O}_4)}{\partial z} \right)_t = \frac{2RTc(\text{NO}_2)}{p^\ominus K} \left( \frac{\partial c(\text{NO}_2)}{\partial z} \right)_t \quad (\text{S3})$$

Therefore, it is obtained setting  $c = c(\text{NO}_2)$

$$J(\text{N}_{\text{IV}}) = \left( \frac{\partial c}{\partial z} \right)_t \left[ D(\text{NO}_2) + c \frac{4RTD(\text{N}_2\text{O}_4)}{p^\ominus K} \right]. \quad (\text{S4})$$

This differential equation describes the concentration of NO<sub>2</sub> as function of the capillary coordinate  $z$ . This equation easily can be solved because due to mass conservation  $J(\text{N}_{\text{IV}})$  is independent of  $z$ . It is obtained after rearrangement

$$\int_{c_1}^{c_2} \left[ D(\text{NO}_2) + c \frac{4RTD(\text{N}_2\text{O}_4)}{p^\ominus K} \right] dc = \int_0^l J(\text{N}_{\text{IV}}) dz. \quad (\text{S5})$$

It is assumed as boundary condition that the concentration at the low concentration side is approximately 0. After integration this equation is written as

$$J(\text{N}_{\text{IV}})l = D_{\text{NO}_2}c(\text{NO}_2) + \frac{2RTD(\text{N}_2\text{O}_4)c^2(\text{NO}_2)}{p^\ominus K} \quad (\text{S6})$$

After back substitution of Eq. (21) this yields Eq. (19) which is the same result one would obtain if NO<sub>2</sub> and N<sub>2</sub>O<sub>4</sub> are not coupled by equilibrium and would diffuse independently.

For further discussion, the degree of dissociation  $\alpha$  is defined by Eq. (20). Therefore, Eq. (19) is written as

$$J(\text{N}_{\text{IV}}) = D(\text{N}_{\text{IV}}) \frac{c(\text{N}_{\text{IV}})}{l} \quad (\text{S7})$$

using

$$D(\text{N}_{\text{IV}}) = \alpha D(\text{NO}_2) + (1 - \alpha) D(\text{N}_2\text{O}_4) \quad (\text{S8})$$

$\alpha$  is obtained from Eq. (21):

$$\alpha = \frac{Kp^\ominus}{4p(\text{N}_{\text{IV}})} \left( \sqrt{1 + \frac{8p(\text{N}_{\text{IV}})}{Kp^\ominus}} - 1 \right). \quad (\text{S9})$$

$p(\text{N}_{\text{IV}})$  corresponds to the NO<sub>2</sub> partial pressure at room temperature in the high concentration flow tube.

### S2 Nomenclature

|                 |                                                         |
|-----------------|---------------------------------------------------------|
| $b$             | temperature coefficient of diffusion                    |
| $c$             | concentration                                           |
| $D$             | diffusion coefficient                                   |
| $D_0$           | diffusion coefficient at STP                            |
| $J$             | flux                                                    |
| $k$             | Boltzmann constant                                      |
| $k_1$           | first order loss rate                                   |
| $K$             | equilibrium constant                                    |
| $l$             | length of diffusion capillary                           |
| $m$             | molecular mass                                          |
| $M$             | molar mass                                              |
| $n$             | number of capillaries in the TT experiment              |
| $\dot{n}$       | carrier gas mass flow rate                              |
| $p$             | pressure                                                |
| $p_0$           | pressure at normal conditions ( $1.013 \times 10^5$ Pa) |
| $p^\ominus$     | standard pressure ( $10^5$ Pa, IUPAC)                   |
| $P$             | probability value                                       |
| $r$             | column radius                                           |
| $R$             | gas constant                                            |
| $t$             | time                                                    |
| $t_a$           | arrest time of AF method                                |
| $T$             | temperature                                             |
| $T_0$           | 273.15 K                                                |
| $v$             | carrier gas velocity                                    |
| $V$             | atomic volume increment                                 |
| $\dot{V}$       | volume flow rate                                        |
| $x$             | mole fraction                                           |
| $z$             | coordinate of column or capillary axis                  |
| $\alpha$        | degree of dissociation                                  |
| $\epsilon$      | characteristic energy of Lennard-Jones potential        |
| $\eta$          | viscosity                                               |
| $\Theta$        | reduced temperature                                     |
| $\Omega_D$      | dimensionless collision integral for diffusion          |
| $\sigma$        | characteristic length of Lennard-Jones potential        |
| $\varsigma_t^2$ | peak variance of the AF method (units of time)          |
| $\varsigma_z^2$ | peak variance of the AF method (units of length)        |
